# Supplementary material for: Hydrothermal carbonization synthesis of amorphous carbon nanoparticles (15–150 nm) with fine-tuning of the size, bulk order, and the consequent impact on antioxidant and photothermal properties
Source: Royal Society of Chemistry journal article supplement (doi:10.1039/d4na00923a), 2025-01-01
Supplement: d4na00923a1.pdf [file d4na00923a1.pdf]

## Supplementary Information

Hydrothermal carbonization synthesis of amorphous carbon nanoparticles (15 – 150 nm) with a fine tuning of the size, bulk order, and the consequent impact on antioxidant and photothermal properties

Francesco Barbero<sup>a\*</sup>, Elena Destro<sup>a</sup>, Aurora Bellone<sup>b</sup>, Ludovica Di Lorenzo<sup>a</sup>, Valentina Brunella<sup>a</sup>, Guido Perrone<sup>b</sup>, Alessandro Damin<sup>a</sup>, Ivana Fenoglio<sup>a</sup>

<sup>a</sup> Department of Chemistry, University of Torino, Torino, Italy

<sup>b</sup> Department of Electronics and Telecommunications, Politecnico di Torino, Torino, Italy

\* Corresponding author

*E-mail address:* francesco.barbero@unito.it

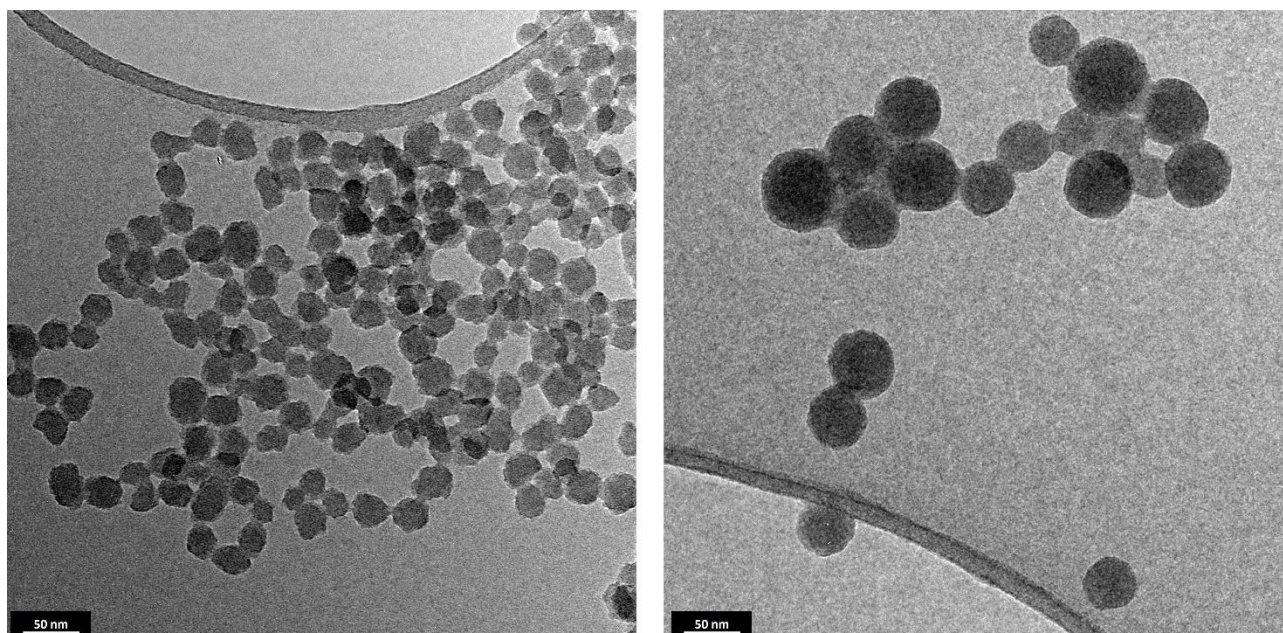

**Figure SI-1.** TEM images of CNP synthesised at 0.022 M glucose in 6 h (left) and 0.22 M – 3 h (right).

| Size (nm) | Glucose 0.022 M |       |       |       | 0.22 M |       |       |       |       | 2.2 M |
|-----------|-----------------|-------|-------|-------|--------|-------|-------|-------|-------|-------|
|           | 3 h             | 6 h   | 9 h   | 15 h  | 1 h    | 3 h   | 4 h   | 5 h   | 6 h   | 3 h   |
| Z-ave     | 16.5            | 30.5  | 40.0  | 141.1 | *      | 79.7  | 96,5  | 189.5 | 627.1 | 834.0 |
| PdI       | 0.101           | 0.057 | 0.114 | 0.161 | *      | 0.072 | 0.026 | 0.191 | 0.136 | 0.172 |

**Table SI-1.** Z-average size and polydispersity indexes of CNP synthesised at different precursor concentration and synthesis times measured by DLS cumulant analysis.

**A**

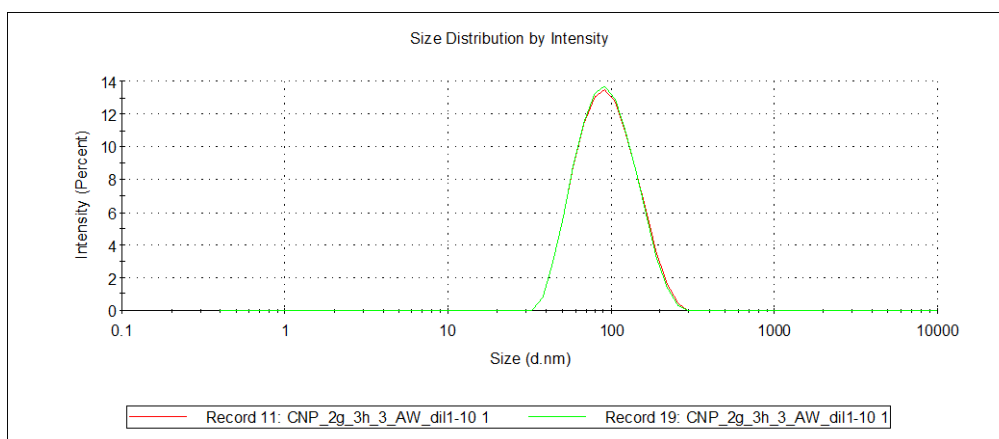

**B**

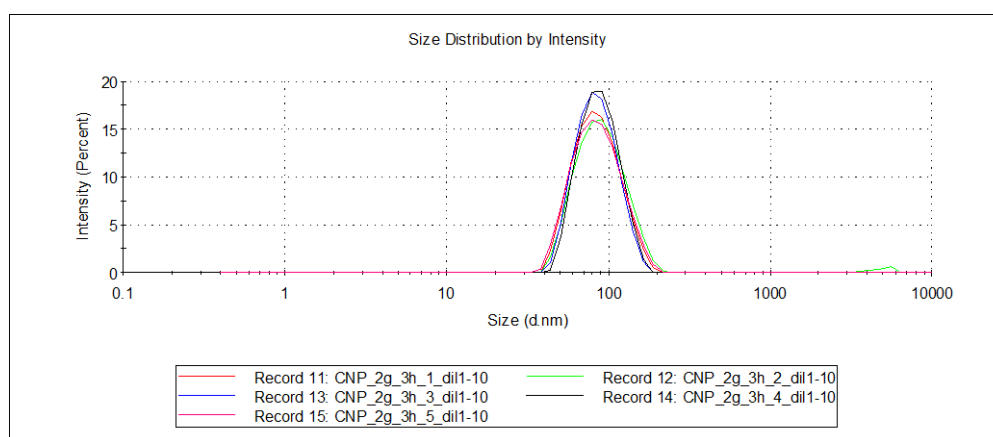

C

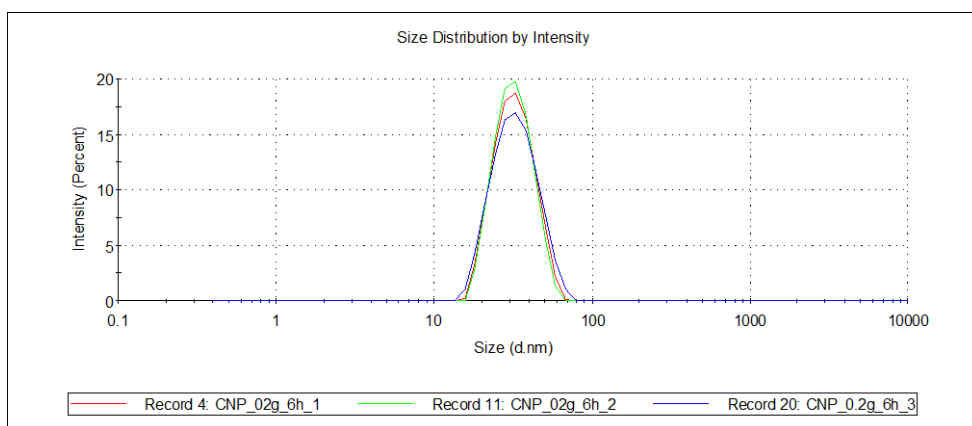

**Figure SI-2.** (A) CNP Stability:  $D_H$  distribution (DLS) of CNP 0.22 M – 3 h after purification at time 0 and after one year at room temperature. (B-C) CNP reproducibility:  $D_H$  distribution (DLS) of 5 different synthesis of CNP 0.22 M – 3 h (C) and of 3 different synthesis of CNP 0.022 M – 6 h.

A

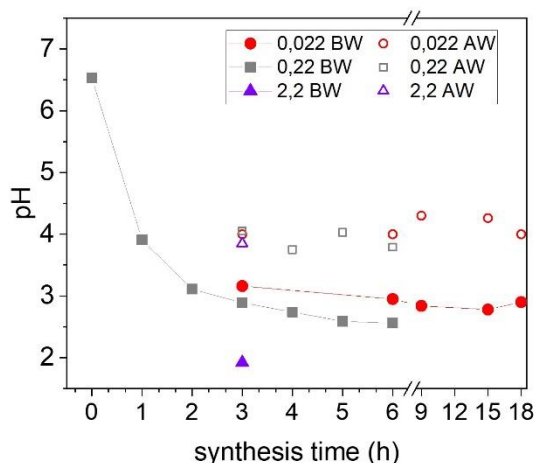

B

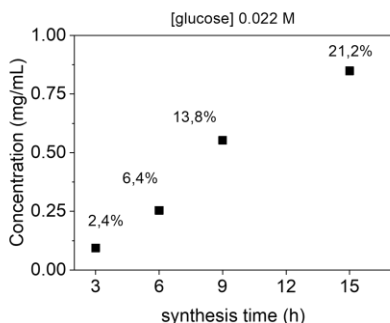

C

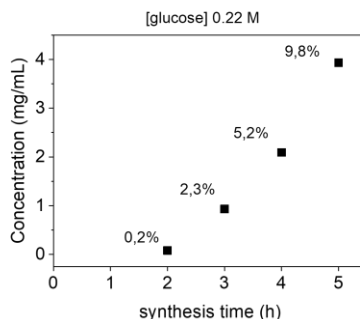

D

[glucose] 2.2 M

| Synthesis time | Concentration (mg/mL) | Yield |
|----------------|-----------------------|-------|
| 3h             | 28,05                 | 7%    |

**Figure SI-3.** (A) pH values of CNP dispersion before purification (filled symbols) and after purification (empty symbols). CNP prepared starting with 0.022 M (red circles), 0.22 M (gray square) and 2.2 M (violet triangles) of glucose solution. (B, C, D) yield of reaction of CNP prepared starting with 0.022 M, 0.22 M and 2.2 M of glucose solution, respectively.

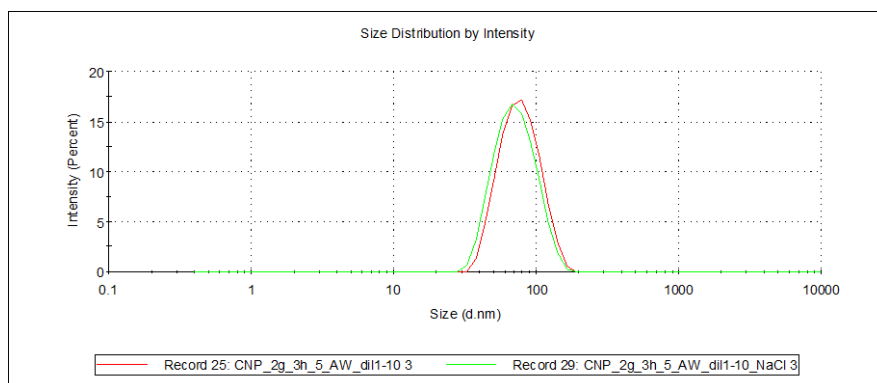

**Figure SI-4.** DLS measurements of CNP 0.22 M – 3h diluted in water (red) or in 137 mM NaCl after 2 h of incubation (green).

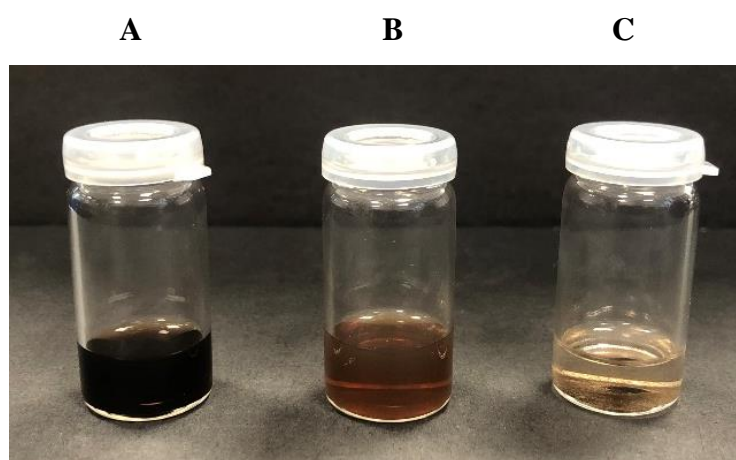

**Figure SI-5.** CNP synthesised starting from 0.022 M glucose and carbonized for 15 h dispersed in: (A) acetone, (B) dichloromethane, (C) n-hexane.

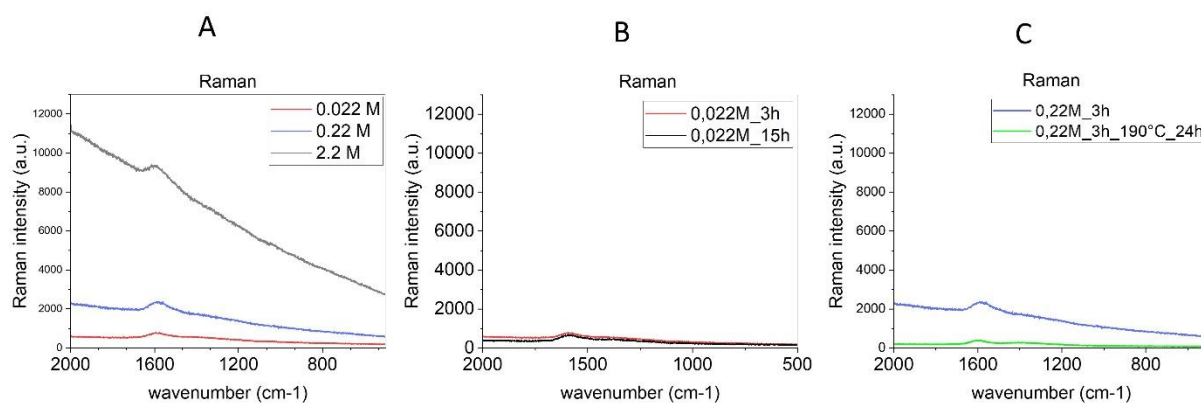

**Figure SI-6.** (A) Raman spectra of CNP synthesized starting from 0.022 M (red), 0.22 M (blue) and 2.2 M (grey) of glucose aqueous solution with a synthesis time of 3h at 190°C. (B) Raman spectra of CNP synthesized starting from 0.022 M glucose aqueous solution with a synthesis time of 3h (red) and 15 h (grey) at 190°C. (C) Raman spectra of CNP synthesized starting from 0.22 M glucose aqueous solution with a synthesis time of 3h (blue) 190°C and the same sample purified and re-heated at 190°C for 24h (green).

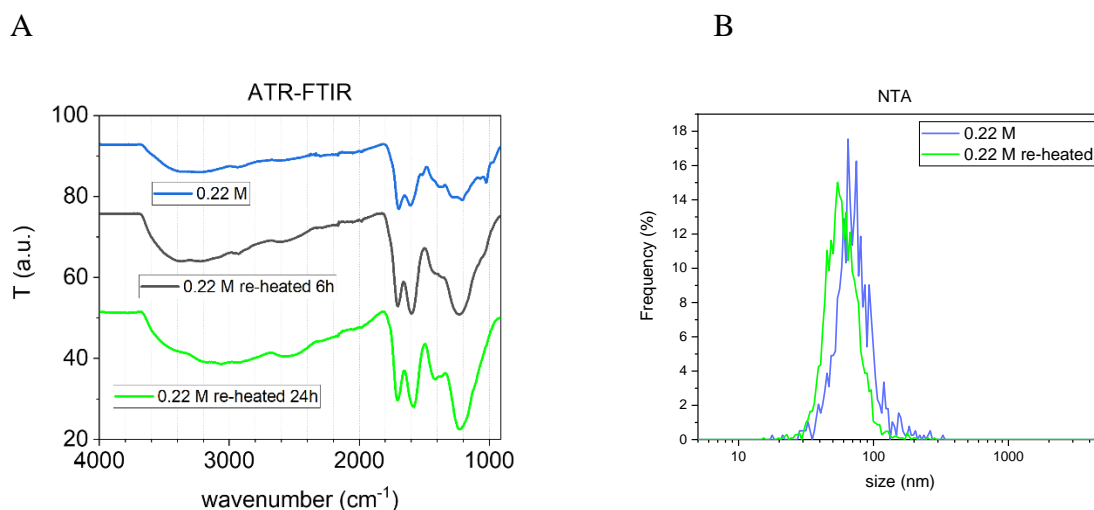

**Figure SI-7.** (A) ATR-FTIR of CNP before (blue) and after been re-heated at 190°C for 6 h (black) 24 h (green). All samples were purified by 30 KDa tangential dialysis. (B) NTA analysis of CNP before (blue) and after be re-heated at 190°C for 24 h (green).

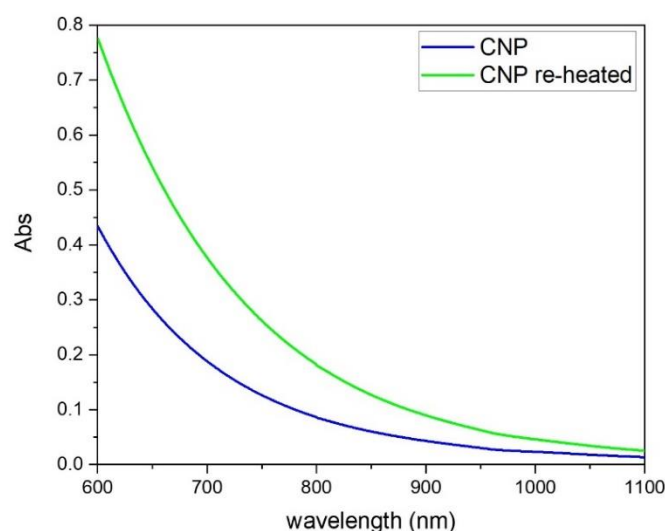

**Figure SI-8.** Vis-NIR spectra of CNP before (blue) and after been re-heated at 190°C for 24 h (green) measured at the same mass concentration.

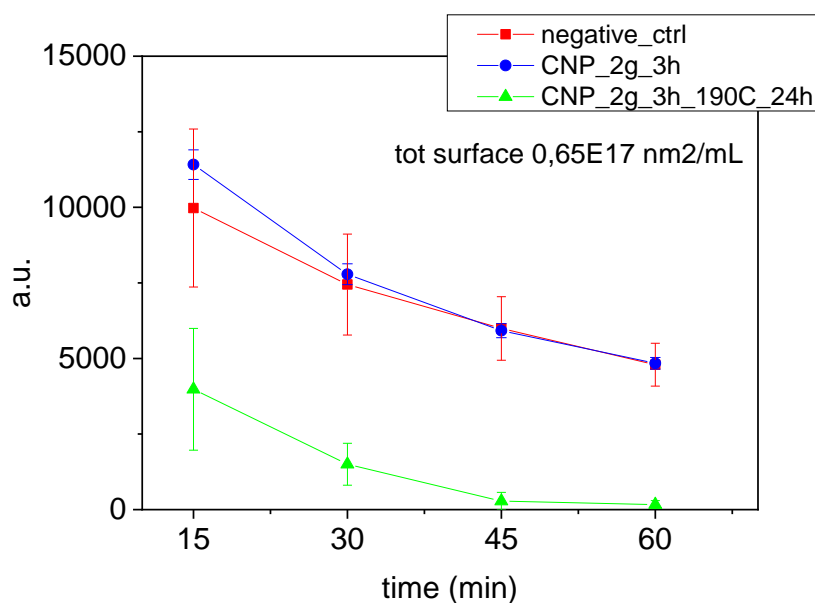

**Figure SI-9.** Scavenging activity of CNP toward hydroxyl radicals generated by Fenton reaction measure by EPR spin-trapping technique. DMPO was used as spin-trap molecule. The graph shows the average and standard deviation intensity of EPR signal at 3305 G after 15, 30, 45 and 60 minutes of incubation. Sample without CNP (red, Ctrl -), have been performed 7 independent experiments in this condition; EPR spectra recorded in presence of: CNP obtained from 0.22 M of glucose in 3 h (blue) and the same sample subsequently re-heated for 24 h at 190°C (green), have been performed 3 independent experiments in these conditions. The number of radicals produced is proportional to the intensity of the EPR signal.
